# Supplementary material for: Measurement of serum 7α-hydroxy-4-cholesten-3-one as a marker of bile acid malabsorption in dogs with chronic diarrhoea: a pilot study
Source: PubMed Central journal article supplement — Vet Rec Open. 2016 Apr 6;3(1):e000163. doi: 10.1136/vetreco-2015-000163 (PMC4838766; doi:10.1136/vetreco-2015-000163), 2016-04-06
Supplement: vetreco-2015-000163supp.pdf [file vetreco-2015-000163supp.pdf]

# Appendix 1 - 7- $\alpha$ -hydroxy-4-cholesten-3-one (C4)

## PRINCIPLE OF THE ASSAY

Manual sample preparation:

1. Pipette 250  $\mu$ l of patient sample into a 1.5ml tube.
2. Add 250  $\mu$ l of protein precipitation reagent.
3. Add 500  $\mu$ l of ice cold acetonitrile and vortex for 30 seconds.
4. Centrifuge for 10 minutes at 12000 RPM.
5. Transfer the supernatant to a glass HPLC injection vial and inject 100  $\mu$ l into the LC-MS/MS system.

Samples are resolved using a Supelco Analytical, Ascentis Express C18 fused core column (15 cm x 4.6 mm, 2.7  $\mu$ m, SigmaAldrich) on a ThermoScientific TLX-2 system using water and methanol mobile phases (each with 0.1% (v/v) formic acid). A ThermoScientific Hot Pocket is used to maintain the column at 40°C. The TLX-2 system is coupled to a ThermoScientific Vantage TSQ triple stage quadrupole mass spectrometer (ThermoScientific, UK) operated with atmospheric pressure chemical ionisation (APCI) source in positive ionisation mode.

## TECHNICAL DATA

### Sample requirements

Serum - Allow samples to clot for two hours at room temperature before centrifugation for 15 minutes at approximately 3000rpm. Assay immediately or store samples in aliquots at -20°C or -80°C for longer term storage. Avoid repeated freeze/thaw cycles.

To assay the sample a minimum of 250  $\mu$ L is required. However, the sample tube should contain at least a volume of 300  $\mu$ L to account for the dead volume.

### Intra-assay precision

|             | Level 1 | Level 2 | Level 3 |
|-------------|---------|---------|---------|
| n           | 10      | 10      | 10      |
| Mean nmol/L | 6.06    | 24.68   | 147.18  |
| CV%         | 3.44    | 2.16    | 1.65    |

### Inter-assay Precision

|             | Level 1 | Level 2 | Level 3 |
|-------------|---------|---------|---------|
| n           | 10      | 10      | 10      |
| Mean nmol/L | 7.06    | 25.50   | 149.32  |
| CV%         | 7.66    | 4.16    | 0.07    |

**Linearity**

Up to 1000 nmol/L, any results above this concentration are reported as >1000. The samples if necessary can be further diluted and repeated in the next batch.

**Sensitivity**

The minimal detectable concentration of C4 is 2.5 nmol/L.

**Reference range**

| n   | C4 (nmol/L) |
|-----|-------------|
| 100 | 2.9 – 134   |
